## Cooperation between Cyclin E and p27<sup>Kip1</sup> in Pituitary Tumorigenesis

Audrey Roussel-Gervais, Steve Bilodeau, Sophie Vallette, France Berthelet, André Lacroix, Dominique Figarella-Branger, Thierry Brue, and Jacques Drouin

Laboratoire de génétique moléculaire (A.R.-G., S.B., S.V., J.D.), Institut de recherches cliniques de Montréal, Montréal, Québec, Canada H2W 1R7; Département de médecine (F.B., A.L.), Centre de recherche du Centre hospitalier de l'Université de Montréal, Université de Montréal, Montréal, Québec, Canada H2W 1T8; Service d'Anatomie pathologie et de Neuropathologie (D.F.-B.), CRO2 Unité Mixte de Recherche, MR911, Assistance publique des Hôpitaux de Marseille, Université de la Méditerranée, 13385 Marseille, France; and Laboratoire Interactions cellulaires neuroendocriniennes (T.B.), Université de la Méditerranée, Centre nationale de la Recherche Scientifique, Unité Mixte de Recherche 6544, Institut Jean-Roche, 13005 Marseille, France

Cushing's disease is caused by glucocorticoid-resistant pituitary corticotroph adenomas. We have previously identified the loss of nuclear Brg1 as one mechanism that may lead to partial glucocorticoid resistance: this loss is observed in about 33% of human corticotroph adenomas. We now show that Brg1 loss of function correlates with cyclin E expression in corticotroph adenomas and with loss of the cell cycle inhibitor p27<sup>Kip1</sup> expression. Because Brg1 is thought to have tumor suppressor activity, the present study was undertaken to understand the putative contribution of cyclin E derepression produced by loss of Brg1 expression on adenoma development. Overexpression of cyclin E in pituitary proopiomelanocortin cells leads to abnormal reentry into cell cycle of differentiated proopiomelanocortin cells and to centrosome instability. These alterations are consistent with the intermediate lobe hyperplasia and anterior lobe adenomas that were observed in these pituitaries. When combined with the p27<sup>Kip1</sup> knockout, overexpression of cyclin E increased the incidence of pituitary tumors, their size, and their proliferation index. These results suggest that cyclin E up-regulation and p27<sup>Kip1</sup> loss-of-function act cooperatively on pituitary adenoma development. (*Molecular Endocrinology* 24: 1835–1845, 2010)

Cyclin-dependent kinases (CDKs) and their activating subunits, the cyclins, are essential for proper cell cycle regulation in eukaryotes. The active cyclin-CDK complexes regulate by phosphorylation a unique set of protein substrates that are essential for progression through different phases of the cell cycle. CDK inhibitors (CDKIs) tightly regulate the cell cycle to ensure appropriate progression of a cell through the different phases of the cycle and arrest (1). To evaluate their specific roles as cell cycle regulators, genetic ablations of cell cycle control proteins were made in mice. Unexpectedly, the loss of function of a subset of these cell cycle regulators preferentially resulted in pituitary tumor development, like ablation of the

CDKIs p18<sup>INK4c</sup> (2, 3), p27<sup>Kip1</sup> (4–7), and also *Rb*<sup>+/-</sup> mice (8). These mutant mice all develop pituitary intermediate lobe (IL) tumors with nearly complete penetrance and also frequent anterior lobe (AL) tumors.

The human pituitary is also very sensitive to spontaneous tumor formation with a prevalence of pituitary adenomas evaluated to be up to 16% (9). Most human pituitary tumors are benign, never diagnosed, and without significant clinical consequence. Some tumors are nonsecreting but others, depending on the cell types affected, produce hormones. Thus, corticotroph adenomas cause Cushing's disease because these tumors express the proopiomelanocortin (POMC) gene and produce excess

ISSN Print 0888-8809 ISSN Online 1944-9917  
Printed in U.S.A.

Copyright © 2010 by The Endocrine Society  
doi: 10.1210/me.2010-0091 Received March 8, 2010. Accepted June 7, 2010.  
First Published Online July 21, 2010

Abbreviations: AL, Anterior lobe; CDK, cyclin-dependent kinase; CDKI, CDK inhibitor; GAPDH, glyceraldehyde-3-phosphate dehydrogenase; Gc, glucocorticoids; GR, glucocorticoid receptor; HDAC, histone deacetylase; IL, intermediate lobe; pH3, phosphohistone H3; POMC, proopiomelanocortin; PRL, prolactin; sibs, siblings; SF-1, steroidogenic factor 1; shpRNA, short hairpin RNA; Wt, wild type.

amounts of ACTH. ACTH secretion from these tumors is increased in part because they are partially resistant to glucocorticoids (Gc) negative feedback regulation (10). The feedback exerted by Gc and their receptor [glucocorticoid receptor (GR)] is necessary to repress *POMC* gene transcription and inhibit ACTH release (11). Gc also inhibit the growth of corticotroph cells (12). We have previously identified two proteins that are essential for GR trans-repression of *POMC* transcription. Indeed, we showed that brahma related-gene 1 (Brg1) and histone deacetylase 2 (HDAC2) are forming a multiprotein complex together with GR and the orphan nuclear receptor nuclear growth factor IB (NGFI-B), and further that all these proteins are required for repression of *POMC* transcription (13). In view of the essential role of Brg1 and HDAC2 in Gc feedback, we assessed their expression in a panel of corticotroph adenomas and found that they are misexpressed in about 50% of Cushing's disease patients, thus providing a molecular mechanism for the Gc resistance of these tumors (13). Brg1 was also known to have tumor suppressor activity (14, 15) and was implicated in the control of the cell cycle. Indeed, it was suggested that Brg1 might act as repressor of cyclin E expression (16). Thus, the loss of nuclear Brg1 activity may contribute to the pathogenesis of Cushing's disease in at least two ways: by causing Gc resistance and by disruption of cell cycle control through derepression of cyclin E expression.

Cyclin E is cyclically expressed during the cell cycle (17). Its expression begins at the late G<sub>1</sub> phase of the cycle and lasts till the end of the S phase. Regulation of cyclin E levels is insured through protein degradation by the proteasome pathway and through transcriptional regulatory mechanisms. Activation and repression of *cyclin E* gene transcription are regulated by members of the E2F family of transcription factors and involve recruitment of corepressors pRb and HDACs (16). Cyclin E binds to the serine/threonine protein kinase cdk2 and activates it to regulate the G<sub>1</sub>-S phase transition. The activity of this complex is preferentially inhibited by its interaction with the CDKI p27<sup>Kip1</sup> (1). On the other hand, the cyclin E/cdk2 complex phosphorylates p27<sup>Kip1</sup>, which causes its dissociation from the complex and targets p27<sup>Kip1</sup> for degradation by the ubiquitin-proteasome pathway (18). Cyclin E is also important to initiate DNA replication by direct activation of S-phase specific genes and also participates in the control of genome stability and the centrosome cycle (19). Deregulation of these processes may contribute to development of malignancies.

There is evidence supporting a primary role for cyclin E in cancer, suggesting that deregulation of this protein may be critical to alter regulation of the G<sub>1</sub>-S transition contributing to tumor development. Overexpression of

cyclin E has been associated with progression of some cancers like breast carcinomas, leukemia, and lymphomas (20, 21). Also, transgenic mouse models of cyclin E overexpression have a tendency to develop malignancies in different tissues, supporting the notion of cyclin E as a dominant oncogene. With regard to Cushing's disease, it was observed that cyclin E is preferentially increased in corticotroph adenomas compared with other pituitary tumors (22).

Here we show that cyclin E expression is repressed by Brg1 in the corticotroph model cells AtT-20. In agreement with this, we show that cyclin E is up-regulated in 100% of corticotroph adenomas that are deficient in nuclear Brg1. Further, these adenomas are very frequently deficient for p27<sup>Kip1</sup> expression. We observed that forced pituitary expression of cyclin E leads to increased cell proliferation, centrosome instability, and sporadic hyperplasia and/or tumors. Significantly, we also found that cyclin E collaborates with p27<sup>Kip1</sup> loss to increase the frequency, size, and proliferation index of pituitary tumors in mice.

## Results

### Cyclin E expression is correlated with p27<sup>Kip1</sup> loss in Brg1-negative Cushing's disease adenomas

Brg1 has been implicated in regulation of cellular proliferation and is a potential tumor suppressor. In particular, it was shown to induce growth arrest, in part, by down-regulation of select E2F target genes such as cyclin E (23). To investigate whether loss of Brg1 correlates with cyclin E expression in human corticotroph adenomas (Fig. 1A), we analyzed the expression of cyclin E by immunohistochemistry in a panel of 25 adenomas from Cushing's disease patients (Fig. 1B and Supplemental Table 1 published on The Endocrine Society's Journals Online web site at <http://mend.endojournals.org>). We used Tpit as a marker of corticotroph cells to delineate tumor and normal pituitary tissue in the pathology specimens (24). As described earlier (13), Brg1 is detected in the nucleus of all cells in normal pituitary tissue but absent from about 33% of corticotroph adenomas (e.g. Fig. 1B). In contrast, cyclin E is normally undetectable by immunohistochemistry in human pituitary but it appears in a fraction of adenomas, whereas expression of p27<sup>Kip1</sup> is lost in a tumor subset (Fig. 1B). Strikingly, all Brg1-negative adenomas are cyclin E positive (100%) in contrast to 70% of Brg1-positive adenomas (Fig. 1A). In addition, a much higher frequency of p27<sup>Kip1</sup>-negative tumors is found in the Brg1-negative group (88% compared with 41% or 18%, for cyclin E-positive and -negative adenomas, respectively). Consistent with the fact that all ade-

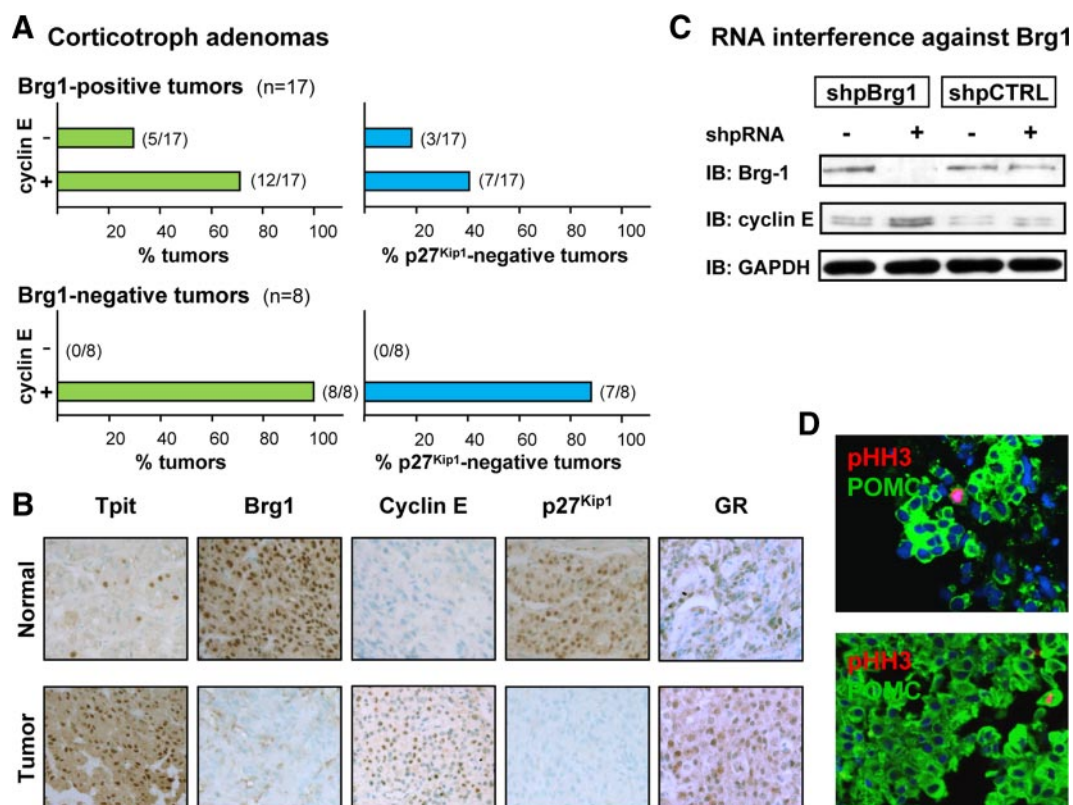

**FIG. 1.** Cyclin E up-regulation and loss of p27<sup>Kip1</sup> expression in corticotroph adenomas. **A**, A panel of 25 human corticotroph adenomas was studied by immunohistochemistry for Brg1, cyclin E, and p27<sup>Kip1</sup> expression. All samples were also positive for ACTH, Tpit, and GR expression. Normal pituitary tissue is always positive for nuclear Brg1 and p27<sup>Kip1</sup> and negative for cyclin E. The *upper panels* represent data for adenomas that are Wt for Brg1 (*i.e.* positive) whereas the *lower panels* represent data for the Brg1-negative subset. For each, the *left panel* indicates percentage of tumors that are either cyclin E negative (Wt) or cyclin E positive, and the *right panels* indicate the proportion of each tumor group that has lost expression of p27<sup>Kip1</sup>. No tumor was ever observed to be Brg1 negative and cyclin E negative. **B**, Immunohistochemical analyses for a representative human Brg1-negative, cyclin E-positive, p27<sup>Kip1</sup>-negative adenoma. Normal pituitary is shown for comparison. **C**, The putative repressor activity of Brg1 on cyclin E expression was verified in AtT-20 cells using RNA interference with a short hairpin loop RNA target against Brg1 (shpBrg1) in comparison with a scrambled-sequence control RNA (shpCTRL). Western blot analysis of Brg1, cyclin E, and GAPDH indicated successful knockdown of Brg1 resulting in up-regulation of cyclin E. **D**, Sections from two representative tumors of the Brg1-negative, cyclin E-positive, and p27<sup>Kip1</sup>-negative group showing colabeling of POMC-positive cells with pHH3. All tumor samples of this group showed similar double-positive cells, but no pHH3-positive, ACTH-negative cells. IB, Immunoblotting.

nomas are from Cushing's disease patients, the bulk of cells in all tumors were positive for ACTH, Tpit, and GR, despite the patient's relative resistance to the dexamethasone suppression test (Fig. 1B).

### Brg1 represses cyclin E expression

To test whether the loss of Brg1 in corticotroph cells, as observed in some Cushing patients (13), could result in up-regulation of cyclin E, we performed RNA knockdown of Brg1 in AtT-20 cells. In contrast to a control short hairpin RNA (shpRNA), a shpRNA directed against Brg1 efficiently reduced Brg1 protein levels, and this was accompanied by an increase in cyclin E as revealed by Western blotting (Fig. 1C). Thus, Brg1 represses cyclin E expression in pituitary corticotroph cells.

### Pituitary overexpression of cyclin E increases differentiated cell proliferation

Proliferation of terminally differentiated cells is rare. Transformation of such cells leading to reentry into cell

cycle could lead to adenoma formation. In most corticotroph adenomas, proliferating cells revealed using the mitosis marker phosphohistone H3 (pHH3), are differentiated because they express ACTH (Fig. 1D). Thus, cycling differentiated corticotroph cells could directly contribute to adenoma development. To test the hypothesis that cyclin E may be sufficient to drive corticotroph cells into the cell cycle and/or induce tumors, we generated transgenic mice overexpressing cyclin E in pituitary corticotrophs and melanotrophs (the POMC-expressing lineages) under control of the *POMC* promoter (Fig. 2A). We established four founder lines that express cyclin E (*Tg-PCE*) at different levels as shown by Western blot analysis (Fig. 2B). Most data presented here were obtained using line 337, but line 649 behaved similarly. To verify that the *POMC-cyclin E* transgene is expressed as expected, we assessed transgene expression by immunofluorescence at embryonic d 18.5. At this developmental stage, POMC-positive cells do not usually express detectable levels of nuclear



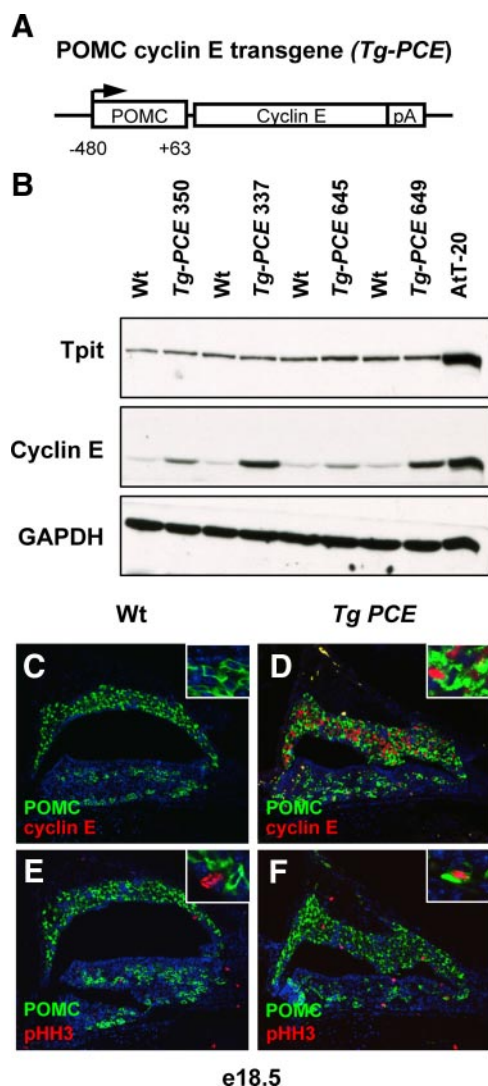

**FIG. 2.** Forced expression of cyclin E in mouse pituitary. **A**, Structure of cyclin E-expressing transgene driven by the rat POMC promoter (*Tg-PCE*). **B**, Analysis of four different transgenic lines compared with their Wt sibs for expression of Tpit, cyclin E, and GAPDH analyzed by Western blot of adult pituitary extracts. The number on top refers to the identification number of each transgenic line. Line 337 was mostly used for further studies, but line 649 also produced similar results. **C**, Characterization of embryonic d 18.5 (e18.5) *Tg-PCE* transgenic mice. Expression of the transgene was assessed on pituitary sections by immunofluorescence. Cyclin E overexpression is detected in a large number of IL melanotroph cells as well as in some AL cells (**D**), whereas no cyclin E was detected in the ACTH-positive cells of sib control embryos (**C**). Analysis of pHH3-positive cells showed few positive cells (usually POMC-negative; **E**, inset) for this marker of mitosis in control pituitary (**E**) but much more frequent positive cells in the transgenic pituitary (**F**), including cells that are positive for both pHH3 and ACTH (**F**, inset).

cyclin E (Fig. 2C), and they do not proliferate as assessed by the mitosis marker pHH3 (Fig. 2E). In *Tg-PCE* pituitaries, cyclin E protein was detectable in most POMC-positive cells (Fig. 2D), and double-positive cells for ACTH and pHH3 were present (Fig. 2F, inset); we also observed double-positive cells by colabeling for Ki67 (data not shown). We conclude that cyclin E overexpres-

sion is sufficient to drive differentiated POMC cells to reenter the cell cycle.

### Hyperplasia, adenomas, and centrosome instability in POMC-cyclin E transgenic mice

No significant morphological differences were observed between Wt and *Tg-PCE* pituitaries at 8 months or 1 yr of age (data not shown). However by 2 yr of age, some *Tg-PCE* pituitaries (three of 17) exhibited hyperplasia of the IL (Tpit, ACTH, Brg1, and p27<sup>Kip1</sup>-positive cells) and another three mice had AL adenomas (Fig. 3A). The frequency of hyperplasia or adenomas was low at 18% each (three of 17), but combined, they represented 36% of mice compared with none in wild-type (Wt) siblings (sibs). It is not clear why hyperplasias were only observed in the IL (Fig. 3C) and tumors in the AL. However, this may correlate with activity of the POMC promoter used (Langlais D. and Drouin J. in preparation) and with the persistent increase in Ki67-positive cells observed in both 8-month and 2-yr transgenic ILs (Fig. 3B). In contrast, *POMC-cyclin E* transgene expression decreased in AL of older mice (data not shown).

Two adenomas were small and well delineated (Fig. 3D), and the third was much larger (Fig. 3E). We investigated the nature of the AL adenomas using markers (Fig. 3F). Surprisingly, no tumor was positive for Tpit or ACTH. All adenomas expressed Pitx1, a marker of the ectodermal origin of the pituitary and were positive for Brg1, cyclin E, and Ki67. Whereas two adenomas were nonsecreting and negative for differentiation markers Tpit, Pit1, and SF1, the third adenoma was positive for prolactin (PRL), GH, and Pit1 (Fig. 3F).

It was previously reported (25–28) that high cyclin E expression leads to centrosome instability and genomic instability (27). To assess whether this may occur in pituitary cells, we investigated centrosome integrity in IL of 2 yr-old *Tg-PCE* mice (Fig. 4). The increased cell proliferation observed in *Tg-PCE* pituitaries (Fig. 3B) is reflected in higher occurrence of cells with duplicated  $\gamma$ -tubulin-positive (19) centrosomes (Fig. 4A). In addition, transgenic pituitaries exhibit significant increases in number of cells with three or more centrosomes (Fig. 4, A and C) and with structurally abnormal centrosomes (Fig. 4, B and C). The increased occurrence of abnormal centrosomes likely contributes to genome instability (28, 29) and may predispose to tumor development.

### Cooperation between cyclin E and p27<sup>Kip1</sup> loss of function

Tumor initiation is a multistep process. The limited effect of overexpressing cyclin E might be due to high levels of cell cycle inhibitors in differentiated cells, and particularly p27<sup>Kip1</sup> in adult pituitary (30). Because

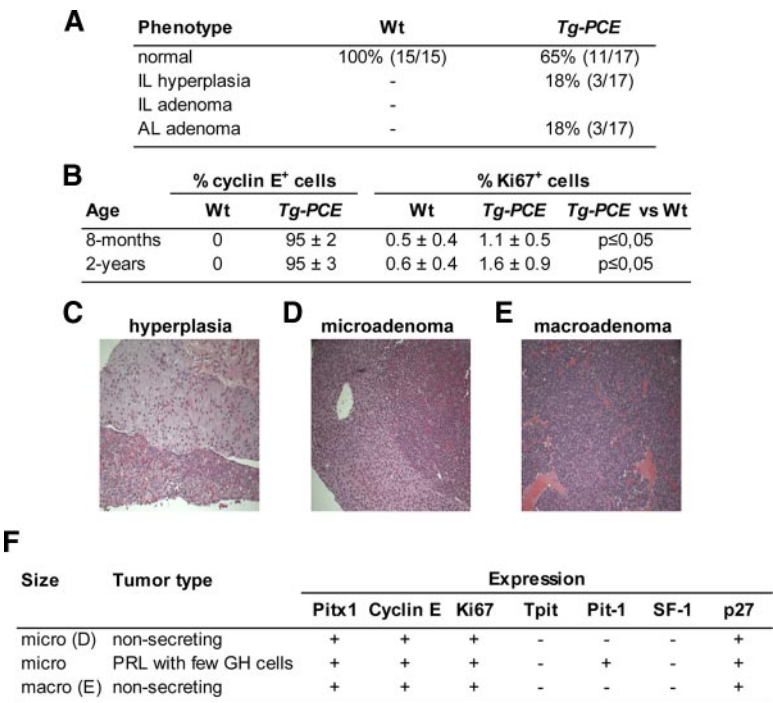

**FIG. 3.** Cyclin E expression increases pituitary proliferation index. **A**, Cohorts of *Tg-PCE* mice and their control sibs (Wt) were investigated at 2 yr of age for a pituitary phenotype. Six transgenic pituitaries of a total of 17 were found to have abnormal pituitaries, three with IL hyperplasia (**C**) and three with AL adenomas (**D–F**). **B**, Quantitation of cyclin E and Ki67-positive cells in adult ILs of *Tg-PCE* transgenic pituitaries compared with their Wt control sibs. Cyclin E-positive and Ki67-positive (a marker of proliferation) cells were identified by immunohistochemistry on pituitary sections of 8-month-old and 2-yr-old mice as indicated. For each group, the number of positive cells was counted on duplicate sections from eight to 10 different mice. **F**, Summary of marker expression in the three AL adenomas. Only one tumor was positive for the differentiation markers Pit-1, PRL, and GH.

*p27<sup>Kip1</sup>* is a key regulator of the cyclin E-cdk2 complex and because activation of this complex leads to inactivation of *p27<sup>Kip1</sup>*, we assessed the impact of cyclin E expression on the expression and status of *p27<sup>Kip1</sup>*. Using the Brg1 knockdown paradigm in AtT-20 cells (Fig. 1C), we observed the resulting cyclin E up-regulation at both mRNA (Fig. 5A) and protein levels (Figs. 1C and 5B). Oddly, opposing effects were observed on *p27<sup>Kip1</sup>* expression, with increased mRNA levels (Fig. 5A) associated with stable or slightly decreased total *p27<sup>Kip1</sup>* (Fig. 5B). However, a convincing decrease of Thr187-phosphorylated *p27<sup>Kip1</sup>* is observed, possibly reflecting increased turnover of *p27<sup>Kip1</sup>*. Because *p27<sup>Kip1</sup>* loss of function leads to IL pituitary tumors (4–7), we investigated whether cyclin E up-regulation would enhance the effect of loss of *p27<sup>Kip1</sup>* on pituitary tumor formation. Representative pituitaries at 8 months of age from each genotype suggest that the combined loss of *p27<sup>Kip1</sup>* with overexpression of cyclin E results in larger pituitary tumors (Fig. 6A). The average tumor weight (Fig. 6B) of *Tg-PCE; p27<sup>Kip1</sup>−/−* mice is about 3 times that of *p27<sup>Kip1</sup>−/−* mice ( $P \leq 0.04$ ) and more than 11-fold the size of Wt

pituitaries ( $P \leq 0.008$ ). The size increase between *Tg-PCE; p27<sup>Kip1</sup>−/−* and *p27<sup>Kip1</sup>−/−* tumors may be explained, in part, by higher proliferation rates stimulated by cyclin E overexpression (Fig. 3B). Indeed, the abundance of Ki67-positive cells appeared greater in *Tg-PCE; p27<sup>Kip1</sup>−/−* mice (Fig. 6C); it is noteworthy that the loss of *p27<sup>Kip1</sup>* has the largest effect on the number of Ki67-positive cells. Ki67-positive cells were counted in both IL and AL of each pituitary in the panel (Fig. 6D). This analysis showed that the increase is mostly evident in the AL ( $P \leq 0.03$ ) where most of the *Tg-PCE; p27<sup>Kip1</sup>−/−* samples have more than 5% Ki67-positive cells compared with the *p27<sup>Kip1</sup>−/−* tumors that predominantly have less than 5%.

In addition, the frequency of both IL and AL tumor formation was increased in *Tg-PCE; p27<sup>Kip1</sup>−/−* compared with *p27<sup>Kip1</sup>−/−*, with frequencies of 100% compared with 72% in the IL and 40% compared with 7% in the AL (Table 1). It was reported that the penetrance of *p27<sup>Kip1</sup>*-dependent pituitary tumors varies with genetic background (31); our observation of 70% IL tumors in mice of mixed background is consistent with previous observations. It is noteworthy that IL and AL adenomas are quite different in these models: indeed, the IL adenoma cells of both *p27<sup>Kip1</sup>−/−* and *Tg-PCE; p27<sup>Kip1</sup>−/−* are always positive for the POMC lineage marker Tpit, indicating that they are differentiated (Table 2). In contrast, Tpit-positive cells were not observed in AL adenomas of *p27<sup>Kip1</sup>−/−* mice, and only one adenoma from *Tg-PCE; p27<sup>Kip1</sup>−/−* pituitaries contained a cluster of Tpit-positive cells. One pituitary adenoma of each genotype contained dispersed cells positive for the gonadotroph marker steroidogenic factor 1 (SF-1), and none were found to have Pit1-positive cells (Table 2). These observations are consistent with prior work that described *p27<sup>Kip1</sup>−/−* pituitary AL tumors as poorly differentiated (32). Because the bulk of adenoma cells are negative for differentiation markers except Pitx1, we assessed expression of two transcription factors that have been associated with pituitary stem or progenitor cells, Sox2 and Sox9 (33). Neither is expressed in *p27<sup>Kip1</sup>−/−* or *Tg-PCE; p27<sup>Kip1</sup>−/−* AL or IL adenomas (Table 2). In summary, the overexpression of cyclin E cooperates with loss of *p27<sup>Kip1</sup>* to increase the frequency, size, and proliferation index of pituitary tumors, notwithstanding the very different differentiation status of IL and AL adenoma cells.

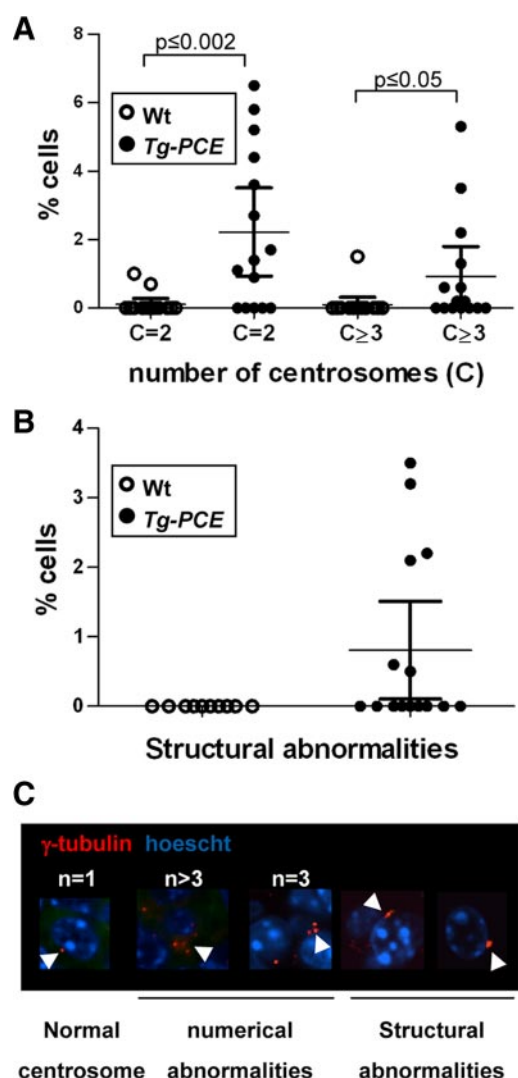

**FIG. 4.** Cyclin E overexpression causes centrosome abnormalities. Centrosomes (C) revealed using  $\gamma$ -tubulin immunofluorescence (19) were analyzed on two sections from each mouse reported in Fig. 3A; analyses were only performed on IL tissues with normal appearance, i.e. not in hyperplastic or tumor areas. Panel A, Dividing cells have two visible centrosomes ( $C = 2$ ), and abnormal numbers of centrosomes are reported as  $C \geq 3$ . Each dot represents data for a different mouse. Bar represents the means  $\pm$  SEM. Panel B, Quantitation of structural centrosome abnormalities. These were never observed in control tissues. Panel C, Examples of centrosomes observed in this study.

## Discussion

### Glucocorticoid resistance and corticotroph adenomas

Although up-regulation of cyclin E was observed in a variety of tumors (20, 21) including pituitary tumors, the present work suggests a causal relationship between up-regulation of cyclin E and a presumably earlier event, the loss of nuclear Brg1 that likely causes glucocorticoid resistance (13). Indeed all Brg1-negative corticotroph adenomas were found to express cyclin E although Brg1-positive tumors also frequently exhibit cyclin E up-regulation, indicating that other mechanisms may account for cyclin E misexpression. These observations on human adenomas are consistent

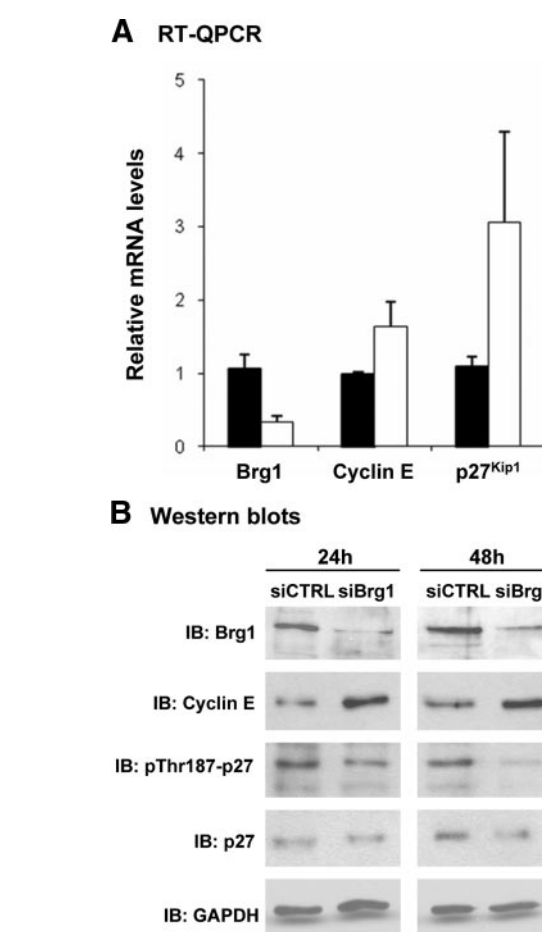

**FIG. 5.** Effect of Brg1 knockdown [small interfering RNA (siRNA)] in AtT-20 cells on cyclin E and p27<sup>Kip1</sup> mRNA and protein levels. A, Quantitative real-time PCR (RT-QPCR) analysis of Brg1, cyclin E, and p27<sup>Kip1</sup> transcripts in AtT-20 after Brg1 knockdown. Brg1 transcripts are decreased 3.1-fold ( $P \leq 0.0001$ ) whereas cyclin E and p27<sup>Kip1</sup> transcripts are increased 1.7-fold ( $P \leq 0.005$ ) and 2.8-fold ( $P \leq 0.05$ ), respectively ( $n = 3$ ). B, Levels of Brg1, cyclin E, p27<sup>Kip1</sup>, phospho-p27<sup>Kip1</sup> (Thr187), and GAPDH in extracts from AtT-20 cells treated with siCTRL and siBrg1 for 24 and 48 h revealed by Western blot. IB, Immunoblotting.

with Brg1-dependent derepression of cyclin E expression in AtT-20 cells (Fig. 1C) and with the unaltered Brg1 expression in cyclin E-expressing mouse pituitaries (Table 2).

No gene or protein has so far been implicated in both Gc resistance and tumorigenesis of pituitary corticotroph adenomas. By documenting a Brg1-dependent up-regulation of cyclin E, the present work clearly supports the idea that Brg1 may be involved in both processes of Gc resistance and corticotroph tumorigenesis. The Brg1-dependent loss of Gc-negative feedback may also directly contribute to corticotroph adenoma development by derepression of other tumor suppressors and/or by activation of tumor-promoting genes.

### Cyclin E and p27<sup>Kip1</sup> in control of pituitary cell growth

The control of G<sub>1</sub>-S transition is of tremendous importance for cell cycle regulation. In particular, cyclin E ex-



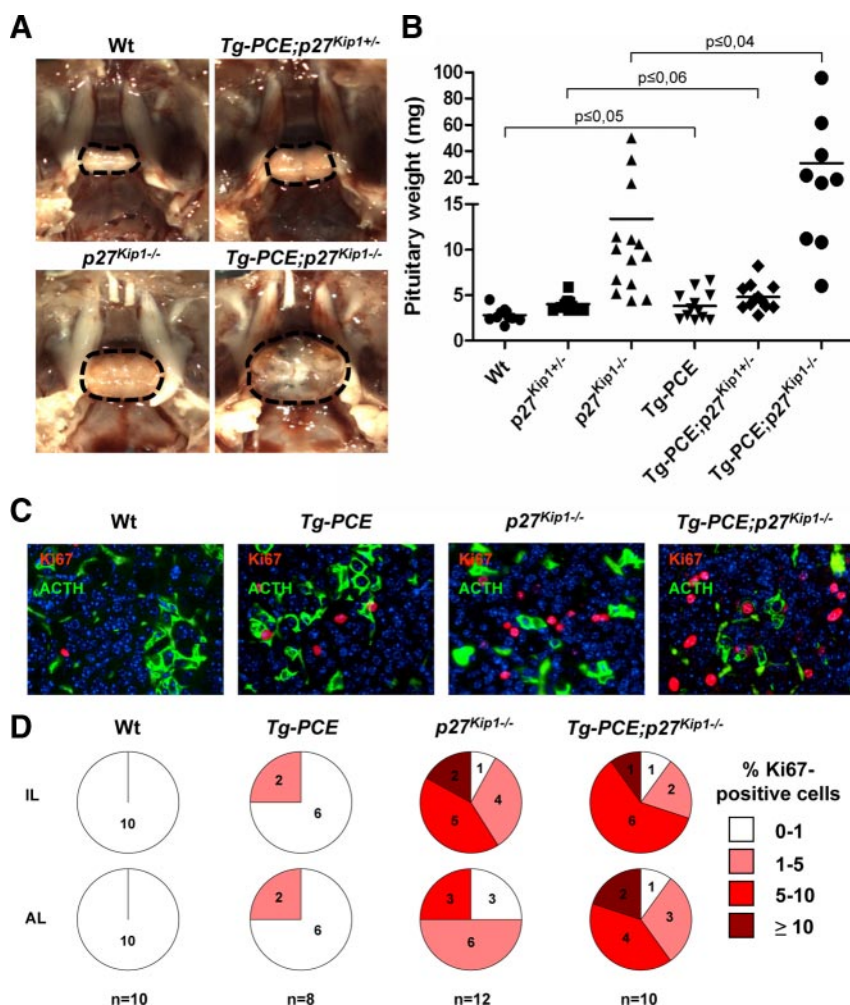

**FIG. 6.** Cyclin E cooperates with  $p27^{Kip1}$  loss of function for pituitary tumor development. **A**, Photographs of representative *in sellae* pituitaries from 8-month-old mice: Wt, *Tg-PCE* and  $p27^{Kip1}$  heterozygote (*Tg-PCE;p27<sup>Kip1</sup>+/-*),  $p27^{Kip1}$  knockout ( $p27^{Kip1-/-}$ ), and *Tg-PCE* transgenic  $p27^{Kip1}$  knockout (*Tg-PCE;p27<sup>Kip1</sup>-/-*). **B**, Distribution of pituitary weights for mice of the different genotypes. The number of pituitaries in each group is indicated in Table 1. Bars represent the medians. **C**, Colabeling of representative anterior pituitary sections for mice of the indicated genotypes using Ki67 as marker of proliferating cells and ACTH to identify corticotrophs. **D**, Quantitation of Ki67-positive cells in the IL and AL of pituitaries from each genotype. The number of mice studied in each group is indicated at the bottom and for each mouse, two sections were quantitated. In each case, the percentage of Ki67-positive cells was subdivided into four categories as indicated. The increased Ki67 index observed in AL of *Tg-PCE;p27<sup>Kip1</sup>-/-* compared with  $p27^{Kip1-/-}$  pituitaries is statistically significant ( $P \leq 0.03$ ).

pression is essential for cell cycle reentry of quiescent cells (34). We showed previously that most adult POMC cells have exited the cell cycle, do not express detectable cyclin E, and express  $p27^{Kip1}$  (30). Cyclin E expression, particularly associated with loss of  $p27^{Kip1}$ , could allow POMC cells to leave their quiescent state and enter S phase. The cyclin E/ $p27^{Kip1}$  balance may thus regulate corticotroph and melanotroph proliferation acting as gatekeeper to protect them from cell cycle reentry. Cyclin E up-regulation, on its own, is unlikely to be sufficient for tumor formation, but we show that it leads to cell cycle reentry of differentiated pituitary POMC cells (Figs. 2F and 3B).

Increased cyclin E/cdk2 would lead to enhanced progression through cell cycle but also to inactivation of  $p27^{Kip1}$  by phosphorylation of Thr187 (18, 35, 36). This phosphorylation targets  $p27^{Kip1}$  for degradation through the ubiquitin proteasome pathway (18). Consistent with enhanced  $p27^{Kip1}$  turnover and degradation, we observed lower steady-state levels of phosphorylated  $p27^{Kip1}$  and total  $p27^{Kip1}$  (Fig. 5B) in AtT-20 cells that exhibit high cyclin E expression. This decrease was observed despite elevated  $p27^{Kip1}$  mRNA (Fig. 5A) in the Brg1 knockdown paradigm used in these experiments. Increased  $p27^{Kip1}$  mRNA may have been caused directly by the Brg1 knockdown or mediated through another regulator. Because  $p27^{Kip1-/-}$  pituitaries did not show increased cyclin E expression (Table 2), the loss of  $p27^{Kip1}$  is unlikely responsible for cyclin E up-regulation. Rather, cyclin E up-regulation is most likely due to the loss of Brg1, possibly mediated through E2F (23).

We observed a strong inverse correlation between cyclin E up-regulation and  $p27^{Kip1}$  expression in the subgroup of Brg1-negative corticotroph adenomas (Fig. 1A, lower panels). In a multistep model of tumor development, the enhanced proliferation caused by cyclin E up-regulation may be an early event, predisposing cells to the effect of a second hit, such as the loss of  $p27^{Kip1}$  expression. The  $p27^{Kip1}$  gene is rarely mutated in pituitary adenomas (37, 38). It was shown in some instances to be silenced through DNA methylation but in most cases,  $p27^{Kip1}$  expression

appears to be down-regulated at the protein level (32, 39). Whereas cyclin E up-regulation may lead to decreased steady-state  $p27^{Kip1}$  as discussed above, other mechanism(s) may also contribute to establishment of tumors by down-regulation of  $p27^{Kip1}$ .

Decreased  $p27^{Kip1}$  was preferentially associated with corticotroph and metastatic pituitary adenomas (40) and further, corticotroph adenomas were found to have higher proliferative index compared with other pituitary adenomas (41, 42). Accordingly in mouse pituitaries, ectopic cyclin E enhanced tumor frequency (Table 1), size

**TABLE 1.** Pituitary phenotype of 8-month-old mice of the indicated genotypes

| Phenotype         | Wt           | Tg-PCE    | p27 <sup>Kip1</sup> −/− | Tg-PCE;p27 <sup>Kip1</sup> −/− |
|-------------------|--------------|-----------|-------------------------|--------------------------------|
| Normal            | 100% (12/12) | 88% (7/8) | 21% (3/14)              | —                              |
| IL hyperplasia    | —            | —         | 7% (1/14)               | —                              |
| IL adenoma        | —            | —         | 72% (10/14)             | 100% (10/10)                   |
| AL hyperplasia    | —            | 12% (1/8) | —                       | —                              |
| AL adenoma        | —            | —         | 7% (1/14)               | 40% (4/10)                     |
| IL and AL adenoma | —            | —         | 7% (1/14)               | 40% (4/10)                     |

The percentage and numbers of observed phenotypes are indicated over the total number of mice in each group. —, Not observed.

(Fig. 6, A and B) and proliferation index (Fig. 6, C and D) of p27<sup>Kip1</sup>-deficient mice, revealing a synergism between these two events. In addition to its effect on proliferation, cyclin E overexpression may also promote tumorigenesis through other mechanisms.

Up-regulation of cyclin E and centrosome instability

In addition to its role in cell cycle control, cyclin E has also been involved in DNA replication, apoptosis, and DNA repair (43). Its expression must be tightly regulated and begins at the G<sub>1</sub> phase until the end of the S phase. During these phases, centrosome duplication and DNA replication are initiated. The presence of two centrosomes at mitosis is critical for the formation of bipolar mitotic spindles that ensure proper DNA partition between two daughter cells. This critical coordination between centrosome and DNA duplication is achieved, in part, by the activation of the cyclin E-cdk2 complex. Perturbation of the control exerted by this complex might result in abnormal multiplication of centrosomes and lead to abnormal mitoses and chromosome segregation errors. Centrosome amplification is a feature frequently seen in various cancer cells, and a mechanism was recently proposed to link centrosome amplification to chromosomal instability (29). In human cancers, centrosome and genomic instability have been associated with cyclin E-overexpressing tumors (19, 44). Interestingly, human pituitary tumors have also been shown to exhibit signs of genome instabil-

ity (45–47). In our Tg-PCE mice, centrosome instability was observed and may contribute to tumor development. It is therefore reasonable to propose that up-regulation of cyclin E expression may predispose to pituitary adenoma formation by producing genome instability.

Differentiation status of pituitary adenoma cells

The analyses of differentiation markers in p27<sup>Kip1</sup>−/− pituitaries indicated that the frequent IL hyperplasia and adenomas contain differentiated POMC- and Tpit-positive cells (Table 2 and Ref. 32). In contrast, the rare AL adenomas are poorly differentiated with a minority of cells expressing only SF-1, a marker of the gonadotroph lineage (Table 2). This pattern was not significantly altered by introduction of the POMC-cyclin E transgene: indeed despite their increased frequency, size, and proliferation index, AL adenomas only occasionally contain Tpit-positive cells.

The appearance of POMC-negative tumors in Tg-PCE transgenics may reflect cyclin E activities other than its well known cell cycle-regulatory functions. Indeed, kinase-independent functions of cyclin E have been reported recently (48) and, in particular, cyclin E has been implicated in asymmetric cell division in *Caenorhabditis elegans* (49) and in cell fate determination in *Drosophila* (50). Thus, cyclin E overexpression may promote low-frequency corticotroph dedifferentiation. Notwithstanding the possibility that transgene expression may be leaky in non-

**TABLE 2.** Expression of pituitary markers in adenomas from p27<sup>Kip1</sup>−/− and Tg-PCE;p27<sup>Kip1</sup>−/− pituitaries

|          | Wt pituitary |              | p27 <sup>Kip1</sup> −/− | Adenomas             | Tg-PCE;p27 <sup>Kip1</sup> −/− | Adenomas                   |
|----------|--------------|--------------|-------------------------|----------------------|--------------------------------|----------------------------|
| Staining | IL           | AL           | IL                      | AL                   | IL                             | AL                         |
| Pitx1    | +            | +            | +                       | +                    | +                              | +                          |
| Brg1     | +            | +            | +                       | +                    | +                              | +                          |
| Tpit     | +            | +            | +                       | —                    | +                              | One cell cluster (1/4)     |
| SF-1     | —            | +            | —                       | Dispersed cells ~ 5% | —                              | Dispersed cells ~ 5% (1/4) |
| Pit-1    | —            | +            | —                       | —                    | —                              | —                          |
| CyclinE  | —            | —            | —                       | —                    | +                              | +                          |
| Sox2     |              | Around lumen | —                       | —                    | —                              | (90%)                      |
| Sox9     |              | Around lumen | —                       | —                    | —                              | —                          |
|          | n = 12       | n = 12       | n = 9                   | n = 1                | n = 10                         | n = 4                      |

The number of pituitary adenomas analyzed for marker expression by immunohistochemistry are indicated at bottom and correspond to adenomas described in Table 1. IL adenomas were positive for Tpit in both genotypes and negative for all other lineage markers. The single AL adenoma from p27<sup>Kip1</sup>−/− pituitary stained positively for SF-1 (~5% cells). One Tg-PCE;p27<sup>Kip1</sup>−/− pituitary AL adenoma exhibited a similar SF-1-positive adenoma, and another AL adenoma contained a cluster of Tpit-positive cells and a mass of undifferentiated cells. All other AL adenomas cells appeared undifferentiated. +, >95% positive cells; −, no positive cells.



POMC cells (at levels below immunofluorescence or green fluorescent protein detection) (51), the appearance of non-POMC-expressing tumors in the transgenics may indicate that upon cyclin E-dependent transformation, the pituitary tumor cells dedifferentiated. Intriguingly, there is no indication of similar dedifferentiation in the IL where transgene expression is maintained throughout adult life (Fig. 3B). To assess the possibility that undifferentiated cells of AL adenomas may have features of pituitary stem or progenitor cells, we tested these cells for expression of Sox2 and Sox9 expression (Table 2). Neither marker is expressed in these adenomas: the differentiation status of these cells remains unclear. These undifferentiated cells may represent a parallel with human tumors that progress to a nonsecreting status.

Recent advances in stem cells and tumor biology led to the hypothesis of cancer stem cells. According to this model, a small number of undifferentiated progenitor cells proliferate and give rise to most of the tumor mass. This does not appear to be the case for many corticotroph adenomas, because we found that proliferating cells are POMC-positive in Brg1-negative/cyclin E-positive tumors (Fig. 1D). Cycling corticotroph adenoma cells are thus differentiated, but they grow slowly compared with more aggressive tumors. These relatively benign tumors may represent a unique example of early tumor development; indeed, they might have gone undetected if it was not for their endocrine consequences. In this context, cyclin E expression with loss of *p27<sup>Kip1</sup>* may constitute sufficient imbalance to allow cell cycle reentry of differentiated cells and adenoma development. Progression to a more aggressive tumor state may be accompanied by appearance of proliferating undifferentiated cells of the cancer stem cell type.

## Materials and Methods

### Generation of transgenic mice

For generation of the *Tg-PCE* transgene, the mouse cyclin E1 cDNA was inserted downstream of the –480-bp POMC promoter, and transgenic mice were generated as described (52); they were back-crossed into the C57Bl/6 background. *p27<sup>Kip1</sup>*-null mice (CD1 genetic background) were obtained from The Jackson Laboratory (Bar Harbor, ME); the series of mice carrying the *p27<sup>Kip1</sup>* mutant allele and/or the *Tg-PCE* transgene (Fig. 6 and Table 1) were analyzed in a mixed genetic background (C57Bl/6;CD1). The genotyping was performed on tail DNA with the following primers; 5'-GAAGTGGCTGCCTCACAC-3' (POMC promoter) and 5'-AGGGCTGACTGCTATCCTCGCTTT-3' (*cyclin E*) for *Tg-PCE*; and 5-CTTGGGTGGAGAGGCTATTC-3' (*neomycin*), 5'-AGGTGAGATGACAGGAGATC-3' (*neomycin*), 5'-CTCCTGCCATTTCGTATCTGC-3' (*p27<sup>Kip1</sup>*), and 5'-GATGACGCCAGACAAGC-3' (*p27<sup>Kip1</sup>*) for *p27<sup>Kip1</sup>*-null mice. All animal experimentation was approved by The Animal Ethics Re-

view Committee of the Institut de recherches cliniques de Montréal (IRCM).

### Western blot and RNA knockdown

*Brg1* shpRNA and si*Brg1* (Dharmacon, Lafayette, CO) were used in AtT-20 culture cells as previously described (13). The following antibodies were used for Western blotting; mouse-anti-Brg1 1:500 (Chemicon, Temecula, CA), rabbit-anticyclin E 1:1000 (M-20, Santa Cruz Biotechnology, Inc., Santa Cruz, CA), mouse-anti-glyceraldehyde-3-phosphate dehydrogenase (GAPDH) 1:50 000 (Abcam, Inc., Cambridge, MA), mouse-anti-p27 1:2000 (BD Biosciences, Palo Alto, CA), goat-anti-p27 (Thr187) 1:500 (Santa Cruz Biotechnology), and antirabbit-Tpit (53).

### Quantitative Real-time PCR

Quantitative real-time PCR analysis of *Brg1*, *cyclin E*, and *p27<sup>Kip1</sup>* transcripts was performed as previously described (54) on AtT-20 RNA after Brg1 knockdown using small interfering RNA against *Brg1* (si*Brg1*) in comparison with random sequence control RNA (siCTRL). The primers used were as follows. *Brg1*: sense, AGATGGTGAGCCTCTGGATGA; antisense, TCATACCTGGGTTCATTTCAAGC.; *Cyclin E*: sense, AAATCAGAC-CACCCAGAGCCT; antisense, TGGAGCTTATAGACTTCG-CACACC; *p27<sup>Kip1</sup>*: sense, TTGGTGGACCAATGCCTGA; antisense, TCTTCTGTTCTGTTGGCCCTT.

### Histology analysis

Pituitaries were dissected from the skull, weighed, and fixed in 4% paraformaldehyde for 4 h before paraffin embedding. Embryos were fixed in 4% paraformaldehyde and embedded in paraffin (55). Pathology specimens from human corticotroph adenomas were previously described (13). Only six adenomas of the series were macroadenomas ( $\geq 10$  mm), and their marker distribution did not differ significantly from other adenomas (Supplemental Table 1). Studies of human adenomas were approved by the IRCM Human Ethics Review Committee.

### Immunohistochemistry and immunofluorescence

Primary antibodies diluted in 10% normal goat serum-0.2% Tween 20 in PBS were incubated overnight and used at the following dilutions: rabbit-anti-Brg1 1:10 (H-88, Santa Cruz Biotechnology), rabbit-anticyclin E 1:100 (M-20, Santa Cruz Biotechnology), rabbit-anti-Ki67 1:100 (Labvision, Fremont, CA), mouse-anti-p27<sup>Kip1</sup> 1: 400 (BD Biosciences), rabbit-anti-Pitx1 (55), rabbit-anti-Tpit 1:200, rabbit-anti-phospho-Histone H3 1:200 (Ser10, Upstate Biotechnology, Inc., Lake Placid, NY), rabbit-anti-SF-1 1:100 (gift from Dr. K. Morohashi), rabbit-anti-Sox2 1:200 (Chemicon, Temecula, CA), rabbit-anti-Sox9 1:200 (gift from Dr. F. Poulat), rabbit-anti-Ki67 1:50 (Labvision), rabbit-anti-Pit1 1:250 (provided by Simon Rhodes), guinea pig-anti-PRL 1:200 (National Hormone and Peptide Program) (53). All secondary antibodies were used 1:150 (Vector Laboratories, Inc., Burlingame, CA). For colocalization, primary antibodies were incubated overnight, after which mouse-anti-POMC 1:200 (Cortex Biochemicals, Concord, MA) and biotinylated antirabbit-IgG 1:150 (Vector Laboratories) were then incubated for 1 h followed by antimouse-fluorescein 1:150 (ImmunoPure Antibody) and streptavidin-fluorescein 1:150 (Molecular Probes, Inc., Eugene, OR). For  $\gamma$ -tubulin/Hoescht staining, a rabbit anti- $\gamma$ -tubulin antibody (gift of Dr. K. Kukasawa) was used at 1:100 dilution.

## Acknowledgments

We thank all colleagues from the laboratory for their critical comments. We also thank Lise Laroche (Institut de recherches cliniques de Montréal, Montréal, Canada) for expert secretarial assistance; Simon Rhodes (Indiana University School of Medicine, Indianapolis, IN), for his generous gift of Pit1 antibody; Dr. K. Morohashi (National Institute for Basic Biology, Okazaki, Japan), for the SF-1 antibody; Dr. Francis Poulat (Centre National de la Recherche Scientifique, Montpellier, France), for the Sox9 antibody. We also thank Dr. K. Fukasawa (H. Lee Moffitt Cancer Center, Tampa, FL), for the  $\gamma$ -tubulin antibody, and Dr. A. F. Parlow (Research Professor of Obstetrics and Gynecology, University of California Los Angeles School of Medicine, National Hormone and Peptide Program) for the GH and PRL antibody.

Address all correspondence and requests for reprints to: Jacques Drouin, Laboratoire de génétique moléculaire, Institut de recherches cliniques de Montréal, 110 avenue des Pins Ouest, Montréal, Quebec, Canada H2W 1R7. E-mail: jacques.drouin@ircm.qc.ca.

This work was supported by research grants (to J.D.) from the Canadian Institutes of Health Research and National Cancer Institute of Canada.

Disclosure Summary. The authors have nothing to disclose.

## References

- Sherr CJ, Roberts JM 1999 CDK inhibitors: positive and negative regulators of G<sub>1</sub>-phase progression. *Genes Dev* 13:1501–1512
- Franklin DS, Godfrey VL, Lee H, Kovalev GI, Schoonhoven R, Chen-Kiang S, Su L, Xiong Y 1998 CDK inhibitors p18(INK4c) and p27(Kip1) mediate two separate pathways to collaboratively suppress pituitary tumorigenesis. *Genes Dev* 12:2899–2911
- Latres E, Malumbres M, Sotillo R, Martín J, Ortega S, Martín-Caballero J, Flores JM, Cerdón-Cardo C, Barbacid M 2000 Limited overlapping roles of p15(INK4b) and p18(INK4c) cell cycle inhibitors in proliferation and tumorigenesis. *EMBO J* 19:3496–3506
- Fero ML, Rivkin M, Tasch M, Porter P, Carow CE, Firpo E, Polyak K, Tsai LH, Broudy V, Perlmutter RM, Kaushansky K, Roberts JM 1996 A syndrome of multiorgan hyperplasia with features of gigantism, tumorigenesis, and female sterility in p27(Kip1)-deficient mice. *Cell* 85:733–744
- Kiyokawa H, Kineman RD, Manova-Todorova KO, Soares VC, Hoffman ES, Ono M, Khanam D, Hayday AC, Frohman LA, Koff A 1996 Enhanced growth of mice lacking the cyclin-dependent kinase inhibitor function of p27(Kip1). *Cell* 85:721–732
- Nakayama K, Ishida N, Shirane M, Inomata A, Inoue T, Shishido N, Horii I, Loh DY, Nakayama K 1996 Mice lacking p27(Kip1) display increased body size, multiple organ hyperplasia, retinal dysplasia, and pituitary tumors. *Cell* 85:707–720
- Chien WM, Rabin S, Macias E, Miliani de Marval PL, Garrison K, Orthel J, Rodriguez-Puebla M, Fero ML 2006 Genetic mosaics reveal both cell-autonomous and cell-nonautonomous function of murine p27Kip1. *Proc Natl Acad Sci USA* 103:4122–4127
- Jacks T, Fazeli A, Schmitt EM, Bronson RT, Goodell MA, Weinberg RA 1992 Effects of an Rb mutation in the mouse. *Nature* 359:295–300
- Ezzat S, Asa SL, Couldwell WT, Barr CE, Dodge WE, Vance ML, McCutcheon IE 2004 The prevalence of pituitary adenomas: a systematic review. *Cancer* 101:613–619
- Arnaldi G, Angeli A, Atkinson AB, Bertagna X, Cavagnini F, Chrousos GP, Fava GA, Findling JW, Gaillard RC, Grossman AB, Kola B, Lacroix A, Mancini T, Mantero F, Newell-Price J, Nieman LK, Sonino N, Vance ML, Giustina A, Boscaro M 2003 Diagnosis and complications of Cushing's syndrome: a consensus statement. *J Clin Endocrinol Metab* 88:5593–5602
- Philips A, Maira M, Mullick A, Chamberland M, Lesage S, Hugo P, Drouin J 1997 Antagonism between Nur77 and glucocorticoid receptor for control of transcription. *Mol Cell Biol* 17:5952–5959
- Svec F 1984 Glucocorticoids inhibit the growth of AtT-20 mouse pituitary tumor cells. *Mol Cell Endocrinol* 35:33–40
- Bilodeau S, Vallette-Kasic S, Gauthier Y, Figarella-Branger D, Brue T, Berthelet F, Lacroix A, Batista D, Stratakis C, Hanson J, Meij B, Drouin J 2006 Role of Brg1 and HDAC2 in GR *trans*-repression of pituitary POMC gene and misexpression in Cushing disease. *Genes Dev* 20:2871–2886
- Reisman DN, Sciarrotta J, Wang W, Funkhouser WK, Weissman BE 2003 Loss of BRG1/BRM in human lung cancer cell lines and primary lung cancers: correlation with poor prognosis. *Cancer Res* 63:560–566
- Gunduz E, Gunduz M, Ouchida M, Nagatsuka H, Beder L, Tsujigiwa H, Fukushima K, Nishizaki K, Shimizu K, Nagai N 2005 Genetic and epigenetic alterations of BRG1 promote oral cancer development. *Int J Oncol* 26:201–210
- Zhang HS, Gavin M, Dahiya A, Postigo AA, Ma D, Luo RX, Harbour JW, Dean DC 2000 Exit from G1 and S phase of the cell cycle is regulated by repressor complexes containing HDAC-Rb-hSWI/SNF and Rb-hSWI/SNF. *Cell* 101:79–89
- Sherr CJ, Roberts JM 2004 Living with or without cyclins and cyclin-dependent kinases. *Genes Dev* 18:2699–2711
- Vlach J, Hennecke S, Amati B 1997 Phosphorylation-dependent degradation of the cyclin-dependent kinase inhibitor p27. *EMBO J* 16:5334–5344
- Hanashiro K, Kanai M, Geng Y, Sicinski P, Fukasawa K 2008 Roles of cyclins A and E in induction of centrosome amplification in p53-compromised cells. *Oncogene* 27:5288–5302
- Iida H, Towatari M, Tanimoto M, Morishita Y, Kodera Y, Saito H 1997 Overexpression of cyclin E in acute myelogenous leukemia. *Blood* 90:3707–3713
- Erlanson M, Landberg G 2001 Prognostic implications of p27 and cyclin E protein contents in malignant lymphomas. *Leuk Lymphoma* 40:461–470
- Jordan S, Lidhar K, Korbonits M, Lowe DG, Grossman AB 2000 Cyclin D and cyclin E expression in normal and adenomatous pituitary. *Eur J Endocrinol* 143:R1–R6
- Hendricks KB, Shanahan F, Lees E 2004 Role for BRG1 in cell cycle control and tumor suppression. *Mol Cell Biol* 24:362–376
- Vallette-Kasic S, Figarella-Branger D, Grino M, Pulichino AM, Dufour H, Grisoli F, Enjalbert A, Drouin J, Brue T 2003 Differential regulation of proopiomelanocortin and pituitary-restricted transcription factor (TPIT), a new marker of normal and adenomatous human corticotrophs. *J Clin Endocrinol Metab* 88:3050–3056
- Kronenwett U, Castro J, Roblick UJ, Fujioka K, Ostring C, Faridmoghaddam F, Laytragoon-Lewin N, Tribukait B, Auer G 2003 Expression of cyclins A, E and topoisomerase II alpha correlates with centrosome amplification and genomic instability and influences the reliability of cytometric S-phase determination. *BMC Cell Biol* 4:8
- Koutsami MK, Tsantoulis PK, Kouloukoussa M, Apostolopoulou K, Pateras IS, Spartinou Z, Drougou A, Evangelou K, Kittas C, Bartkova J, Bartek J, Gorgoulis VG 2006 Centrosome abnormalities are frequently observed in non-small-cell lung cancer and are associated with aneuploidy and cyclin E overexpression. *J Pathol* 209:512–521
- Spruck CH, Won KA, Reed SI 1999 Deregulated cyclin E induces chromosome instability. *Nature* 401:297–300
- Fukasawa K 2005 Centrosome amplification, chromosome instability and cancer development. *Cancer Lett* 230:6–19
- Ganem NJ, Godinho SA, Pellman D 2009 A mechanism link-

- ing extra centrosomes to chromosomal instability. *Nature* 460: 278–282
30. Bilodeau S, Roussel-Gervais A, Drouin J 2009 Distinct developmental roles of cell cycle inhibitors p57Kip2 and p27Kip1 distinguish pituitary progenitor cell cycle exit from cell cycle re-entry of differentiated cells. *Mol Cell Biol* 29:1895–1908
  31. Chien WM, Garrison K, Caufield E, Orthel J, Dill J, Fero ML 2007 Differential gene expression of p27Kip1 and Rb knockout pituitary tumors associated with altered growth and angiogenesis. *Cell Cycle* 6:750–757
  32. Lloyd RV, Ruebel KH, Zhang S, Jin L 2002 Pituitary hyperplasia in glycoprotein hormone  $\alpha$  subunit-, p18(INK4C)-, and p27(kip-1)-null mice: analysis of proteins influencing p27(kip-1) ubiquitin degradation. *Am J Pathol* 160:1171–1179
  33. Fauquier T, Rizzoti K, Dattani M, Lovell-Badge R, Robinson IC 2008 SOX2-expressing progenitor cells generate all of the major cell types in the adult mouse pituitary gland. *Proc Natl Acad Sci USA* 105:2907–2912
  34. Geng Y, Yu Q, Sicinska E, Das M, Schneider JE, Bhattacharya S, Rideout WM, Bronson RT, Gardner H, Sicinski P 2003 Cyclin E ablation in the mouse. *Cell* 114:431–443
  35. Sheaff RJ, Groudine M, Gordon M, Roberts JM, Clurman BE 1997 Cyclin E-CDK2 is a regulator of p27Kip1. *Genes Dev* 11:1464–1478
  36. Müller D, Bouchard C, Rudolph B, Steiner P, Stuckmann I, Saffrich R, Ansorge W, Huttner W, Eilers M 1997 Cdk2-dependent phosphorylation of p27 facilitates its Myc-induced release from cyclin E/cdk2 complexes. *Oncogene* 15:2561–2576
  37. Ikeda H, Yoshimoto T, Shida N 1997 Molecular analysis of p21 and p27 genes in human pituitary adenomas. *Br J Cancer* 76:1119–1123
  38. Tanaka C, Yoshimoto K, Yang P, Kimura T, Yamada S, Moritani M, Sano T, Itakura M 1997 Infrequent mutations of p27Kip1 gene and trisomy 12 in a subset of human pituitary adenomas. *J Clin Endocrinol Metab* 82:3141–3147
  39. Yoshino A, Katayama Y, Ogino A, Watanabe T, Yachi K, Ohta T, Komine C, Yokoyama T, Fukushima T 2007 Promoter hypermethylation profile of cell cycle regulator genes in pituitary adenomas. *J Neurooncol* 83:153–162
  40. Lidhar K, Korbonits M, Jordan S, Khalimova Z, Kaltsas G, Lu X, Clayton RN, Jenkins PJ, Monson JP, Besser GM, Lowe DG, Grossman AB 1999 Low expression of the cell cycle inhibitor p27Kip1 in normal corticotroph cells, corticotroph tumors, and malignant pituitary tumors. *J Clin Endocrinol Metab* 84:3823–3830
  41. Mastronardi L, Guiducci A, Spera C, Puzzilli F, Liberati F, Maira G 1999 Ki-67 labelling index and invasiveness among anterior pituitary adenomas: analysis of 103 cases using the MIB-1 monoclonal antibody. *J Clin Pathol* 52:107–111
  42. Korbonits M, Chahal HS, Kaltsas G, Jordan S, Urmanova Y, Khalimova Z, Harris PE, Farrell WE, Claret FX, Grossman AB 2002 Expression of phosphorylated p27(Kip1) protein and Jun activation domain-binding protein 1 in human pituitary tumors. *J Clin Endocrinol Metab* 87:2635–2643
  43. Mazumder S, DuPree EL, Almasan A 2004 A dual role of cyclin E in cell proliferation and apoptosis may provide a target for cancer therapy. *Curr Cancer Drug Targets* 4:65–75
  44. Nishimura T, Takahashi M, Kim HS, Mukai H, Ono Y 2005 Centrosome-targeting region of CG-NAP causes centrosome amplification by recruiting cyclin E-cdk2 complex. *Genes Cells* 10: 75–86
  45. Szymas J, Schluens K, Liebert W, Petersen I 2002 Genomic instability in pituitary adenomas. *Pituitary* 5:211–219
  46. Chesnokova V, Melmed S 2009 Pituitary tumour-transforming gene (PTTG) and pituitary senescence. *Horm Res* 71(Suppl 2):82–87
  47. Dworakowska D, Grossman AB 2009 The pathophysiology of pituitary adenomas. *Best Pract Res Clin Endocrinol Metab* 23: 525–541
  48. Geng Y, Lee YM, Welcker M, Swanger J, Zagozdzon A, Winer JD, Roberts JM, Kaldis P, Clurman BE, Sicinski P 2007 Kinase-independent function of cyclin E. *Mol Cell* 25:127–139
  49. Fujita M, Takeshita H, Sawa H 2007 Cyclin E and CDK2 repress the terminal differentiation of quiescent cells after asymmetric division in *C. elegans*. *PLoS ONE* 2:e407
  50. Berger C, Pallavi SK, Prasad M, Shashidhara LS, Technau GM 2005 A critical role for cyclin E in cell fate determination in the central nervous system of *Drosophila melanogaster*. *Nat Cell Biol* 7:56–62
  51. Lavoie PL, Budry L, Balsalobre A, Drouin J 2008 Developmental dependence on NurRE and EboxNeuro for expression of pituitary POMC. *Mol Endocrinol* 22:1647–1657
  52. Tremblay Y, Tretjakoff I, Peterson A, Antakly T, Zhang CX, Drouin J 1988 Pituitary-specific expression and glucocorticoid regulation of proopiomelanocortin fusion gene in transgenic mice. *Proc Natl Acad Sci USA* 85:8890–8894
  53. Lamolet B, Pulichino AM, Lamonerie T, Gauthier Y, Brue T, Enjalbert A, Drouin J 2001 A pituitary cell-restricted T-box factor, Tpit, activates POMC transcription in cooperation with Pitx homeoproteins. *Cell* 104:849–859
  54. Rambaud J, Desroches J, Balsalobre A, Drouin J 2009 TIF1 $\beta$ /KAP-1 is a coactivator of the orphan nuclear receptor NGFI-B/Nur77. *J Biol Chem* 284:14147–14156
  55. Lanctôt C, Lamolet B, Drouin J 1997 The *bicoid*-related homeoprotein Ptx1 defines the most anterior domain of the embryo and differentiates posterior from anterior lateral mesoderm. *Development* 124:2807–2817
